# 1 **Ubiquilin proteins regulate EGFR levels and activity in lung** 2 **adenocarcinoma cells**

3 **Running title:** Regulation of EGFR by UBQLN proteins

4 **Authors:** Zimple Kurlawala<sup>1\*5</sup>, Kumar Saurabh<sup>1\*</sup>, Rain Dunaway<sup>2</sup>, Parag P. Shah<sup>1</sup>, Leah  
5 J. Siskind<sup>1,3</sup> and Levi J. Beverly<sup>1,3,4,#</sup>

## 6 **Affiliations:**

7 <sup>1</sup>James Graham Brown Cancer Center, School of Medicine, University of Louisville,  
8 Louisville, KY USA.

9 <sup>2</sup>School of Medicine, University of Louisville, KY, USA

10 <sup>3</sup>Department of Pharmacology and Toxicology, University of Louisville, Louisville, KY,  
11 USA.

12 <sup>4</sup>Division of Hematology and Oncology, School of Medicine, University of Louisville,  
13 Louisville, KY, USA.

14 <sup>5</sup>Laboratory of Molecular Gerontology, National Institute on Aging, National Institutes of  
15 Health, Baltimore, MD, USA (author's present address).

16 \*Equal authors

17 #Corresponding author (Email: [levi.beverly@louisville.edu](mailto:levi.beverly@louisville.edu))  
18

## 19 **Abstract**

20 Ubiquilin proteins (UBQLNs) are involved in diverse cellular processes like ERAD  
21 (endoplasmic reticulum associated degradation), autophagy, apoptosis and epithelial to  
22 mesenchymal transition. UBQLNs interact with a variety of substrates, including cell  
23 surface receptors, transcription factor regulators, proteasomal machinery proteins, and  
24 transmembrane proteins. Additionally, previous work from our lab shows that UBQLN1  
25 interacts with IGFR family members (IGF1R, IGF2R, INSR) and this interaction regulates  
26 the activity and proteostasis of IGFR family members. Here, we examined regulation of  
27 UBQLN1 with Epidermal Growth Factor Receptor (EGFR) in lung adenocarcinoma cells.

28 Loss of UBQLN1 occurs at high frequency in human lung cancer patient samples and we  
29 have shown that loss of UBQLN1 is capable altering processes involved in cell  
30 proliferation, migration, invasion and epithelial to mesenchymal transition in lung  
31 adenocarcinoma cell lines. Here, we present data that loss of UBQLN1 resulted in  
32 increased turnover of total EGFR, whilst increasing the relative amount of active EGFR  
33 in lung adenocarcinoma cells, especially in the presence of its ligand EGF. Furthermore,  
34 loss of UBQLN1 led to a more invasive cell phenotype as manifested by increased  
35 proliferation, migration and speed of movement of these lung adenocarcinoma cells.  
36 Taken together, UBQLN1 regulates expression and stability of IGFRs and EGFR,  
37 members of the receptor tyrosine kinase family of proteins in lung cancer cells.

38 **Key Words:** UBQLN1, Ubiquilin, EGFR, cancer, IGFR

39

## 40 **Introduction**

41 Cancer and Alzheimer's disease (AD) are seemingly caused by contrasting cellular  
42 processes; aberrant cell survival for cancer and aberrant cell death for AD (Shafi, 2016).  
43 The family of adapter proteins, Ubiquilins (UBQLNs), are lost in multiple types of cancers  
44 as well as in AD (Beverly, Lockwood, Shah, Erdjument-Bromage, & Varmus, 2012;  
45 Viswanathan et al., 2011; Y. Wang et al., 2015). This family consists of five members;  
46 UBQLN1-4 and UBQLNL, which contains an N-terminus ubiquitin-like (UBL) domain and  
47 a C-terminus ubiquitin-associated (UBA) domain (Kleijnen et al., 2000; Z. Kurlawala,  
48 Shah, Shah, & Beverly, 2017; Marin, 2014). Ubiquilin1 is involved in a variety of cellular  
49 processes like ERAD (endoplasmic reticulum associated degradation) (Lim et al., 2009;  
50 Shah et al., 2015), autophagy (Lee, Arnott, & Brown, 2013; Elsa-Noah N'Diaye et al.,

51 2009), apoptosis (Sun et al., 2015) and epithelial to mesenchymal transition (EMT) (Shah  
52 et al., 2015; Yadav et al., 2017). Ubiquilin1 also interacts with diverse substrates –  
53 proteins involved in the proteasomal machinery (PSMD4, BAG6) (Z. Kurlawala, Shah, et  
54 al., 2017) cell surface receptors, GABA-A (Saliba, Pangalos, & Moss, 2008), GPCR's (E.  
55 N. N'Diaye et al., 2008), PSEN1/2 (Mah, Perry, Smith, & Monteiro, 2000; Massey et al.,  
56 2004), IGF1R (Z. Kurlawala, Dunaway, et al., 2017; Z. Kurlawala, Shah, et al., 2017),  
57 transcription factor regulators, I $\kappa$ B $\alpha$  (Feng et al., 2004) and other transmembrane proteins  
58 ESYT2 (Z. Kurlawala, Shah, et al., 2017), CD47 (Wu, Wang, Zheleznyak, & Brown, 1999)  
59 and BCLb (Beverly et al., 2012). Ubiquilin1 is a versatile, multi-purpose adaptor that  
60 interacts with a wide range of substrates; thus, it can regulate multiple important cellular  
61 processes.

62 UBQLN2, is another UBQLN family member that is constitutively expressed in most cell  
63 types and shares more than 75% homology with UBQLN1, indicating that it likely shares  
64 similar biological functions (Marin, 2014). Like UBQLN1, UBQLN2 also has a UBL domain  
65 which interacts with the proteasome and a UBA domain which recognizes ubiquitin on  
66 target proteins (Kleijnen, Alarcón, & Howley, 2003; Renaud, Picher-Martel, Codron, &  
67 Julien, 2019). Additionally, UBQLN2 has a 12-PXX repeat region which makes it unique  
68 among the UBQLN family proteins (Renaud et al., 2019).

69 Receptor tyrosine kinases (RTKs) are cell surface receptors found to be responsible for  
70 mediating signaling pathways crucial to cell proliferation, cell migration and invasion of  
71 many types of cancer (Zwick, Bange, & Ullrich, 2001). Our lab was first to identify  
72 interaction of UBQLN1 with a RTK family member, namely insulin-like growth factor  
73 receptors (IGFRs) (Z. Kurlawala, Dunaway, et al., 2017). Loss of UBQLN1 leads to a

74 significant decrease in the amount of total IGF1R, an increase in phosphorylated IGF1R  
75 and dramatic increases in their migratory potential when stimulated with IGF in lung  
76 adenocarcinoma. Epidermal growth factor receptor (EGFR), a transmembrane protein  
77 that is also a member of the RTK family, is mutated or over-expressed in multiple cancers  
78 and AD (Lurje & Lenz, 2009; Porta et al., 2011; Tavassoly, Sato, & Tavassoly, 2020).  
79 EGFR is one of the most commonly studied oncogenes to date. It is often upregulated in  
80 multiple cancers, and downregulated in AD (Shafi, 2016). This unique inverse relationship  
81 between cancer and AD has been classified for a wide array of proteins, including p53,  
82 IGF1R and BCL2 (Shafi, 2016). EGFR is a well-established therapeutic target of kinase  
83 inhibitors (gefitinib, erlotinib, and lapatinib) and monoclonal antibodies (cetuximab,  
84 panitumumab, and trastuzumab). Many of these therapeutics are now being used as first  
85 line treatment for both lung cancer and Alzheimer's patients (Lurje & Lenz, 2009; Porta  
86 et al., 2011; Tavassoly et al., 2020). In this study, we present data establishing the  
87 interaction of UBQLN1 and UBQLN2 with EGFR. In lung adenocarcinoma cell lines,  
88 downregulation of UBQLN1, followed by EGF stimulation, leads to degradation of total  
89 EGFR protein, and an increase in migration and invasion potential of these cells.

90

## 91 **Materials and Methods**

### 92 ***Cell Culture, Transfection and EGF stimulation***

93 Human embryonic kidney 293T (HEK293T) cells were procured from American Type  
94 Culture Collection (ATCC, Rockville, MD, USA) and cultured in DMEM medium  
95 (#SH30243, Hyclone, Logan, UT, USA) supplemented with 10% fetal bovine serum  
96 (#SH30070, Hyclone, Logan, UT, USA) and 1% antibiotic/antimycotic (#SV30010,

97 Hyclone, Logan, UT, USA) at 37<sup>0</sup>C with 5% CO<sub>2</sub>. A549 (lung adenocarcinoma line) were  
98 procured from ATCC and cultured in RPMI (#SH30027, Hyclone, Logan, UT, USA)  
99 supplemented with 10% FBS, 1% antibiotic/antimycotic. siRNA transfections were  
100 performed as described previously(Z. Kurlawala, Dunaway, et al., 2017).<sup>19</sup> Briefly, 48  
101 hours after transfection, cells were serum starved (SS) for 3 hours, incubated with protein  
102 synthesis inhibitor, Cycloheximide (CH, 10μM) for 1 hour prior to supplementing serum-  
103 free media with 25 or 50 ng/ml based on the experiment. EGF (#PHG0314, Thermo Fisher  
104 Scientific, Waltham, MA, USA). 3 hours later, cells were harvested and probed for EGFR  
105 (total and phosphorylated) protein by Western Blot analysis. For dose and time-  
106 dependent studies, cells were stimulated and/or incubated for doses and time-points  
107 indicated in respective figures.

#### 108 ***Plasmid Construction***

109 As described previously, constructs with deleted domains of UBQLN1 (Figure 1A), were  
110 developed using Q5 Site-Directed mutagenesis kit as per manufacturers protocol (New  
111 England Biolabs # E0554; Ipswich, MA, USA) and confirmed by sequencing(Z. Kurlawala,  
112 Shah, et al., 2017).<sup>7</sup>

#### 113 ***Immunoprecipitation, Protein estimation and Western Blot***

114 Immunoprecipitation (IP) was performed as described previously. Harvested cells for  
115 each procedure (IP and/or transfection) were lysed with 1% CHAPS lysis buffer and total  
116 protein was estimated using the BCA quantification method(Z. Kurlawala, Shah, et al.,  
117 2017). Western blot analyses were performed in Bolt Bis-Tris gels (#BG4120BOX, Life  
118 Technologies, Grand island, NY, USA) as per manufacturer's protocol using antibodies  
119 from Santa Cruz, Dallas, TX, USA (GAPDH # sc47724); Sigma-Aldrich, St. Louis, MO,

120 USA (Actin # A5316); Yenzym Antibodies LLC, South San Francisco, CA, USA (UBQLN  
121 polyclonal was made by inoculating rabbits with a peptide specific to UBQLN1); and Cell  
122 Signaling, Danvers, MA, USA (UBQLN1 # 14526, FLAG # 14793, EGFR # 4267, pEGFR  
123 Tyr1068 # 3777).

#### 124 ***Cell viability and Migration assay***

125 Cell viability and migration assays were performed as described earlier.<sup>19</sup> Briefly, A549  
126 cells were cultured in 60mm culture plates. After 12 hours of transfection with siRNA, cells  
127 were trypsinized, counted and 2000 cells were reseeded per well in 96-well plates in  
128 complete media. 12 hours post-reseeding in complete media, cells were serum starved  
129 for 3 hours followed by stimulation with EGF and were cultured in media containing 2%  
130 FBS. Cell viability was analyzed for four successive days using AlamarBlue™  
131 (#DAL1100, Thermo Fisher Scientific, Waltham, MA, USA). At the same time following  
132 transfection, 5000 cells were seeded in Transwell™ cell culture inserts (#CLS3464,  
133 Corning Inc., Corning, NY, USA) in triplicate for each condition as described previously.<sup>19</sup>  
134 Briefly, cells were allowed to grow on Transwell™ cell culture insert in serum free media,  
135 serum free media supplemented with EGF (50ng/ml) and serum free media  
136 supplemented with both EGF and Erlotinib (1μM). After 24hrs, membranes were washed  
137 once with PBS, fixed with ethanol, stained with Giemsa stain (#R03055, Sigma-Aldrich,  
138 St. Louis, MO, USA) and cells were counted on microscope.

#### 139 ***Live Cell Imaging***

140 A549 cells were transfected with siRNA against UBQLN1 and non-targeting control. 24  
141 hours post-transfection, cells were trypsinized, counted and 10,000 cells were reseeded  
142 per well in 12-well plate, coated with thin layer commercial extracellular matrix (ECM #

143 E6909, Sigma-Aldrich, St. Louis, MO, USA) at a concentration of  $1\mu\text{g}/\text{cm}^2$  for 12 hours  
144 (overnight) in complete media. Next day, all wells were serum starved for 3 hours. Cells  
145 were then maintained in media with 2% FBS or 2% media supplemented with EGF  
146 (25ng/ml). Cells were imaged for 48hrs on a time-interval of 15mins on Keyence BZ-X810.  
147 All pictures were stitched together to produce a video with speed of 14fps. For dynamic  
148 tracking, 5 single cells were analyzed on Keyence BZ-X810 software to generate  
149 Chemotaxis plot and to calculate movement and speed of cells.

### 150 ***RNAi Sequences***

151 All RNAi (siRNAs) used for study were ordered from Thermo Fisher Scientific Biosciences  
152 Inc. Lafayette, CO 80026, USA and transfections were done using Dharmafect1 as per  
153 the supplier's instructions.

#### 154 **1. Non-Targeting Control**

155 UAAGGCUAUGAAGAGAUACAA

#### 156 **2. UBQLN1**

157 siU1<sup>1</sup>: GAAGAAAUCUCUAAACGUUUUUU

158 siU1<sup>2</sup>: GUACUACUGCGCCAAAUUUUU

### 159 ***Statistical Analysis***

160 All statistics were performed using GraphPad Prism 8 software. Unless otherwise  
161 specified, significance was determined by one-way ANOVA, using a cut off of  $p < 0.05$ .

162

## 163 **Results**

### 164 ***Ubiquilin1 and Ubiquilin2 interact with EGFR***

165 Our previous data described that UBQLN1 interacts with IGF1R. In this study, we aimed  
166 to explore the possibility that UBQLN proteins might interact with and regulate additional  
167 RTK family members, like EGFR. We first performed co-immunoprecipitation (IP) of  
168 UBQLNs to identify interacting proteins (Figure 1). We transiently transfected HEK293T  
169 cells with UBQLN1-FLAG or UBQLN2-FLAG constructs, then pulled down UBQLN-  
170 interacting proteins using anti-FLAG conjugated agarose beads. Western blot analysis of  
171 these FLAG-IP samples revealed that UBQLN1 and UBQLN2 interacted with total EGFR  
172 (Figure 1B). Like UBQLN1, UBQLN2 has an N-terminus UBL, a C-terminus UBA and four  
173 STI (STI1-4) domains, plus UBQLN2 has an additional, unique PXX (12 tandem repeats)  
174 domain (Figure 1A). To determine the interacting domain of UBQLN1, we created two  
175 constructs as described in Figure 1A and performed similar co-immunoprecipitation  
176 experiment. For one construct, we deleted the UBA domain of UBQLN1 (labeled 542X),  
177 and for the second construct we deleted the UBL domain (labeled 112X). Our results  
178 indicated that the UBL domain is the primary site of interaction with EGFR. Deletion of  
179 the UBA domain did not cause a loss of interaction between UBQLN1 and EGFR (Figure  
180 1C).

### 181 ***Ubiquilin1 regulates expression and activity of EGFR***

182 Next, we investigated whether loss of UBQLN1 regulated EGFR expression and activity  
183 in lung adenocarcinoma cells (Figure 2). A549 cells were transiently transfected with non-  
184 targeting siRNA (NT) and two UBQLN1-specific siRNAs (Figure 2A). Cells were then  
185 serum starved (SS) to synchronize the cell cycle and remove all confounding growth  
186 factors present in serum. Then cells were treated with cycloheximide (CH) to prevent  
187 synthesis of new EGFR protein. Upon loss of UBQLN1, there was a decrease in total



188 EGFR expression compared to the NT control. This decrease in total EGFR expression  
189 was significantly enhanced when the receptor was stimulated with EGF ligand. Next, we  
190 tested regulation of total EGFR when stimulated with different doses of EGF ligand  
191 (Figure 2B). There was significantly increased degradation of total EGFR in cells lacking  
192 UBQLN1 compared to controls at 10ng/ml, which was enhanced at 100ng/ml.  
193 Interestingly, expression of phosphorylated EGFR was not as sensitive to the loss of  
194 UBQLN1. Therefore, in cells lacking UBQLN1, there was an EGF dose-dependent  
195 degradation of EGFR.

196 Next, we performed experiments to determine temporal regulation of EGFR by UBQLN1  
197 (Figure 2D, E). Lung adenocarcinoma cells were transfected with non-targeting or  
198 UBQLN1-specific siRNAs. Two days post-transfection, cells were serum starved for 3  
199 hours, then stimulated with EGF (50ng/ml) for indicated time points. Upon stimulation with  
200 EGF, we observed degradation of total EGFR as time progressed. However, in cells  
201 lacking UBQLN1, there was significantly increased degradation compared to control as  
202 time progressed.

### 203 ***Ubiquilin1-deficient cells exhibit increased cell viability and migration potential***

204 EGFR proteins play a role in maintaining cell viability and stimulating migratory potential  
205 of lung adenocarcinoma cells. We investigated the influence of loss of UBQLN1 on these  
206 EGFR mediated processes (Figure 3). A549 cells were transiently transfected with siRNA  
207 for Ubiquilin1 and non-targeting control and cultured in different conditions as indicated  
208 (complete media, serum starvation (SS) for 3 hours, SS + EGF (50ng/ml),  
209 SS+EGF+Erlotinib, a phospho-EGFR inhibitor, 1uM). Cells were harvested after 3 hours  
210 and analyzed by Western Blot. When stimulated with EGF, Ubiquilin1 deficient cells

211 showed almost complete loss of total EGFR and increased expression of phosphorylated  
212 EGFR, which was blocked by Erlotinib (Figure 3A). Next, A549 cells were transfected with  
213 non-targeting or UBQLN1-specific siRNAs, and cell viability was measured for four  
214 consecutive days using alamarBlue™ (Figure 3B). Consistent with our previous findings,  
215 loss of UBQLN1 resulted in increased cell growth in lung adenocarcinoma cell lines.  
216 Interestingly, there was an increase in the relative number of cells in UBQLN1 deficient  
217 cells stimulated with EGF, compared to controls. Next, we determined the effects of loss  
218 of UBQLN1 on cell migration (Figure 3C, D). Using a Transwell™ migration plate, we  
219 seeded A549 cells that had been transfected with either non-targeting or UBQLN1-  
220 specific siRNAs and cultured the cells under three conditions - serum-free media (SF);  
221 SF media supplemented with EGF; and SF media supplemented with EGF and Erlotinib,  
222 a phospho-EGFR inhibitor. Consistent with our previous data using this migration model,  
223 UBQLN1 deficient cells exhibited an approximately 3-fold increase in migration when  
224 stimulated with EGF. Erlotinib decreased migration of cells in both control and UBQLN1  
225 deficient cells.

### 226 ***Loss of Ubiquilin1 results in increased cell movement and speed***

227 We examined individual cell movement and speed to explore increased migratory  
228 potential in cells lacking UBQLN1 (Figure 4). We utilized live cell imaging equipped with  
229 image analysis software (Keyence). A549 lung adenocarcinoma cells were transfected  
230 with non-targeting or UBQLN1-specific siRNAs for 24 hours after which they were serum  
231 starved for another 24 hours. At this point, 10,000 cells per well (12-well plate) were  
232 seeded on a thin layer of commercial extracellular matrix (ECM) in the presence or  
233 absence of EGF (25ng/ml) to yield the following conditions: siNT (+/-) EGF and siUBQLN1

234 (+/-) EGF. Live cell images were captured for 48 hours using a Keyence microscope. All  
235 captured images were stitched together to make a representative video (Figure S1). As  
236 evident from the videos, loss of UBQLN1 resulted in increased movement of A549 cells  
237 which was further enhanced by EGF stimulation. These data are represented as  
238 chemotaxis plots (Figure 4A). Additionally, we quantified the distance traveled and the  
239 rate of travel (speed) for each cell (Figure 4B). These data show that cells lacking  
240 UBQLN1 travel further and move faster as compared to the non-targeting controls. These  
241 differences were enhanced in the presence of EGF.

242

## 243 **Discussion**

244 UBQLN1 was reported to be lost in approximately fifty percent of non-small cell lung  
245 adenocarcinomas. Our group is interested in understanding how loss of function of  
246 UBQLN proteins contributes to the metastatic progression of human lung  
247 adenocarcinoma.(Z. Kurlawala, Dunaway, et al., 2017; Shah et al., 2015; Yadav et al.,  
248 2017). Previously we have shown that interaction between UBQLN1 with IGF1R results  
249 in stabilization of this receptor. When UBQLN1 is lost, it leads to increased  
250 phosphorylation of the auto-phosphorylation site on the IGF receptor, while total IGF1R  
251 levels decreased. Similarly, in this manuscript, we report that loss of UBQLN1 does not  
252 alter phosphorylated EGFR expression while causing a robust decrease in total EGFR  
253 expression. Additionally, we have reported dose and time dependent decreases in total  
254 IGF1R when stimulated with IGF ligand (Z. Kurlawala, Dunaway, et al., 2017). Likewise,  
255 in this study, lung adenocarcinoma cells lacking UBQLN1 also exhibit an enhanced  
256 degradation of EGFR when stimulated with EGF that is both dose and time dependent.

257 These data suggest that loss of UBQLN1 accelerates both EGFR and IGF1R turnover in  
258 cancer cells. UBQLN1 might be crucial to maintain the stability of these RTKs (Z  
259 Kurlawala & Beverly, 2017), thus influencing pro-growth and pro-survival signaling  
260 pathways in lung adenocarcinoma cells.

261 We have previously demonstrated that downregulation of UBQLN1 leads to significantly  
262 increased expression of mesenchymal markers like Vimentin, Snail and ZEB1 indicating  
263 that UBQLN1 may play a role in suppression of metastasis in lung cancer (Shah et al.,  
264 2015). Additionally, knockdown of UBQLN1 by siRNA or mir155-mediated  
265 downregulation of UBQLN1 in lung cancer cells promoted an EMT-like phenotype. Data  
266 presented here further supports the role of UBQLN1 in proliferation and migration of  
267 cancer cells and this was exacerbated in the presence of EGF stimulation. These results,  
268 when considered in conjunction with our previous work with IGF1R, suggest that cells  
269 lacking UBQLN1, then stimulated with IGF or EGF, enhanced the metastatic potential of  
270 cancer cells (Z. Kurlawala, Dunaway, et al., 2017). Our results point to a destabilization of  
271 these RTKs when UBQLN1 is lost which further leads to an invasive phenotype in lung  
272 adenocarcinoma cells. In a related study, UBQLN4, another member of the UBQLN  
273 family, was shown to interact with RNF11, an E3 ubiquitin ligase of p21. Overexpression  
274 of UBQLN4 induced cellular senescence and cell cycle arrest in gastric cancer cells (S.  
275 Huang et al., 2019). These findings further support significance of UBQLN proteins in  
276 cancer progression and tumorigenesis. As reported here, cells that lack UBQLN1 show  
277 increased cell movement and speed captured with live cell imaging over multiple days.  
278 The overall movement and speed of these lung adenocarcinoma cells was further  
279 accelerated in the presence of EGF stimulation. RTK family of kinases play critical roles

280 in progression of human lung cancer. In non-small cell lung cancer (NSCLC), IGFR and  
281 EGFR are overexpressed and UBQLNs are underexpressed and synergistically  
282 contribute to tumor development and progression (Guo et al., 2017; Oliveira, Schiffelers,  
283 Storm, Henegouwen, & Roovers, 2009). Collectively, these data indicate a critical role for  
284 UBQLNs in the normal proteolytic degradation of RTKs and loss of UBQLN function in  
285 cancer cells leads to aberrant RTK-mediated signaling, further enhancing the metastatic  
286 potential of these cancers. Downstream pathways activated by these cell surface  
287 receptors crosstalk and upon mutual activation lead to acquired resistance against EGFR-  
288 targeted drugs. We propose that targeting both EGF and IGF receptors at once might  
289 enhance anti-tumor efficacy and would be a promising approach for NSCLC  
290 therapies(Guo et al., 2017; Oliveira et al., 2009; Yeo et al., 2015). Being able to target  
291 both of these pathways simultaneously via their interaction with UBQLNs is an exciting  
292 avenue to explore.

293 Our lab is also interested in the phenomenon of inverse relation of cancer with  
294 neurodegenerative disorders. Single nucleotide polymorphisms (SNPs) in UBQLN1 gene  
295 are associated with late onset of Alzheimer's Disease (AD) (Bertram et al., 2005).  
296 Additionally, mutations found in UBQLN2, provide a possible pathophysiological link for  
297 worse prognosis in amyotrophic lateral sclerosis/frontotemporal dementia  
298 (ALS/FTD)(Brettschneider et al., 2012; Renaud et al., 2019). After UBQLN1 was found to  
299 interact with the presenilin complex via a yeast-two hybrid screen, research efforts were  
300 quickly underway to establish the role that UBQLN family members might play in  
301 neurodegenerative diseases(Bertram et al., 2005; Brettschneider et al., 2012; Hiltunen et  
302 al., 2006; Mah et al., 2000; Renaud et al., 2019; Viswanathan et al., 2011). Perhaps,

303 UBQLN family members inversely regulate outcomes in cancer and neurodegenerative  
304 diseases such that loss of function of UBQLN proteins in epithelial cells leads to a  
305 cancerous phenotype while in post-mitotic neurons leads to a degenerative phenotype.  
306 UBQLNs could play a regulatory role in presenilin complex assembly by directly, or  
307 indirectly, altering the stability of individual proteins found in these complexes thereby  
308 destabilizing the complex as a whole and leading to the pathogenesis of the disease state.  
309 Further experiments would be needed in order to establish the exact role.

310 Interestingly, some members of the BCL2 family, IGF1R, and EGFR are overexpressed  
311 in cancer but under-expressed in brains of AD patients (Shafi, 2016). Interestingly, each  
312 of these proteins, either in this study or in our previous work, have been shown to be  
313 stabilized by UBQLN1 (Beverly et al., 2012; Z Kurlawala & Beverly, 2017). In AD,  $\beta$ -  
314 amyloid aggregations accumulate in the brain. Studies have shown that inhibiting IGF1R  
315 and EGFR leads to significant reduction in  $\beta$ -amyloid aggregations (Wang et al. 2012;  
316 Gontier et al., 2015). Polyubiquitination of EGFR regulates its cellular location and  
317 stability, and this ubiquitination can be decreased by mutating the lysine residues without  
318 having an effect on the tyrosine kinase activity of EGFR(F. Huang, Kirkpatrick, Jiang,  
319 Gygi, & Sorkin, 2006). Thus, inhibition of RTKs could not only benefit certain subsets of  
320 cancer, it could also be beneficial in several neurodegenerative diseases(Gontier,  
321 George, Chaker, Holzenberger, & Aïd, 2015; Tavassoly et al., 2020; L. Wang et al., 2012).  
322 These studies further support our belief that UBQLNs might be regulating multiple  
323 diseases indirectly.

324 In conclusion, the UBA-UBL domain-containing family of UBQLNs facilitate normal  
325 proteasomal degradation, and substrate selection by UBQLNs is critical in cancer and

326 neurodegenerative diseases. Our IP data provides evidence for interaction of both  
327 UBQLN1 and UBQLN2 (shares more than 75% homology with UBQLN1) with EGFR.  
328 Taken together with our previous findings, both IGF1Rs and EGFR were detected as  
329 interacting partners of UBQLN1. The lung adenocarcinoma cells lacking UBQLN1 exhibit  
330 enhanced degradation of both EGFR and IGF1R, especially in the presence of their  
331 respective ligands. Thus, UBQLN1 is important in maintaining stability of RTKs, like  
332 EGFR and IGF1R. Loss of UBQLN1 alters the normal degradative fate of these receptors  
333 leading to downstream alterations in signaling that result in a cellular phenotype with  
334 enhanced proliferation, migration and movement of the cells. The RTK family of proteins  
335 are highly regulated in both cancer and neurodegenerative diseases and this sets the  
336 stage for the development of directed therapies. Our work with UBQLNs indicates that  
337 they are uniquely poised as therapeutic targets given their role in regulating the stability  
338 of multiple members of the RTK family, and this regulation might be inversely impacted  
339 in cancer versus neurodegenerative diseases.

340

#### 341 **List of Abbreviations**

342 AD: Alzheimer's disease; UBQLNs: Ubiquilin family of adapter proteins; UBA: Ubiquitin-  
343 associated domain; UBL: Ubiquitin-like domain; APP:  $\beta$ -amyloid precursor protein; ER:  
344 Endoplasmic reticulum; EMT: Epithelial to mesenchymal transition; BCL2: B-cell  
345 lymphoma 2; RTK: Receptor tyrosine kinase; IGF1R: Insulin-like growth factor receptor;  
346 EGFR: Epidermal growth factor receptor; ALS: Amyotrophic lateral sclerosis; NSCLC:  
347 Non-small cell lung cancer; EGF: Epidermal growth factor (ligand).

348

349 **Declarations**

350 ***Consent for publication***

351 Not applicable

352 ***Availability of data and materials***

353 The datasets used and/or analyzed during the current study are available from the  
354 corresponding author upon reasonable request.

355 ***Competing interests***

356 The authors declare that they have no competing interests

357 ***Funding***

358 This work was supported by NIH R01CA193220, Kentucky Lung Cancer Research  
359 Program (KLCRP) and funds from James Graham Brown Cancer Center, University of  
360 Louisville to LJB. RD was supported by NIH National Cancer Institute Cancer Education  
361 Program grant R25-CA134283. The funding bodies have no role in the design of the  
362 study; collection, analysis, and interpretation of data; and in writing the manuscript.

363 ***Authors' contributions***

364 KS, ZK, RD and PPS did the experiments. KS, ZK, LJS and LJB conceived studies, did  
365 the analysis and wrote the manuscript. All authors have read and approved the  
366 manuscript.

367 ***Acknowledgements***

368 We are grateful to the Beverly and Siskind lab members, especially Lavona Casson and  
369 Mark Doll, for continuous support and sharing of resources and insight.

370

371 **References**



- 372 Bertram, L., Hiltunen, M., Parkinson, M., Ingelsson, M., Lange, C., Ramasamy, K., . . .  
373 Tanzi, R. E. (2005). Family-based association between Alzheimer's disease and  
374 variants in UBQLN1. *N Engl J Med*, 352(9), 884-894. doi:10.1056/NEJMoa042765
- 375 Beverly, L. J., Lockwood, W. W., Shah, P. P., Erdjument-Bromage, H., & Varmus, H.  
376 (2012). Ubiquitination, localization, and stability of an anti-apoptotic BCL2-like  
377 protein, BCL2L10/BCLb, are regulated by Ubiquilin1. *Proc Natl Acad Sci U S A*,  
378 109(3), E119-126. doi:10.1073/pnas.1119167109
- 379 Brettschneider, J., Van Deerlin, V. M., Robinson, J. L., Kwong, L., Lee, E. B., Ali, Y. O., .  
380 . . Elman, L. (2012). Pattern of ubiquilin pathology in ALS and FTLD indicates  
381 presence of C9ORF72 hexanucleotide expansion. *Acta Neuropathol*, 123(6), 825-  
382 839.
- 383 Feng, P., Scott, C. W., Cho, N. H., Nakamura, H., Chung, Y. H., Monteiro, M. J., & Jung,  
384 J. U. (2004). Kaposi's sarcoma-associated herpesvirus K7 protein targets a  
385 ubiquitin-like/ubiquitin-associated domain-containing protein to promote protein  
386 degradation. *Mol Cell Biol*, 24(9), 3938-3948. Retrieved from  
387 <https://www.ncbi.nlm.nih.gov/pubmed/15082787>
- 388 Gontier, G., George, C., Chaker, Z., Holzenberger, M., & Aïd, S. (2015). Blocking IGF  
389 signaling in adult neurons alleviates Alzheimer's disease pathology through  
390 amyloid- $\beta$  clearance. *Journal of Neuroscience*, 35(33), 11500-11513.
- 391 Guo, X.-F., Zhu, X.-F., Cao, H.-Y., Zhong, G.-S., Li, L., Deng, B.-G., . . . Zhen, Y.-S.  
392 (2017). A bispecific enediyne-energized fusion protein targeting both epidermal  
393 growth factor receptor and insulin-like growth factor 1 receptor showing enhanced  
394 antitumor efficacy against non-small cell lung cancer. *Oncotarget*, 8(16), 27286.

- 395 Hiltunen, M., Lu, A., Thomas, A. V., Romano, D. M., Kim, M., Jones, P. B., . . .  
396 Berezovska, O. (2006). Ubiquilin 1 modulates amyloid precursor protein trafficking  
397 and A $\beta$  secretion. *Journal of Biological Chemistry*, 281(43), 32240-32253.
- 398 Huang, F., Kirkpatrick, D., Jiang, X., Gygi, S., & Sorkin, A. (2006). Differential regulation  
399 of EGF receptor internalization and degradation by multiubiquitination within the  
400 kinase domain. *Molecular Cell*, 21(6), 737-748.
- 401 Huang, S., Li, Y., Yuan, X., Zhao, M., Wang, J., Li, Y., . . . Huang, C. (2019). The Ubl-  
402 UBA Ubiquilin4 protein functions as a tumor suppressor in gastric cancer by p53-  
403 dependent and p53-independent regulation of p21. *Cell Death Differ*, 26(3), 516-  
404 530. doi:10.1038/s41418-018-0141-4
- 405 Kleijnen, M. F., Alarcón, R. M., & Howley, P. M. (2003). The ubiquitin-associated domain  
406 of hPLIC-2 interacts with the proteasome. *Molecular biology of the cell*, 14(9),  
407 3868-3875.
- 408 Kleijnen, M. F., Shih, A. H., Zhou, P., Kumar, S., Soccio, R. E., Kedersha, N. L., . . .  
409 Howley, P. M. (2000). The hPLIC proteins may provide a link between the  
410 ubiquitination machinery and the proteasome. *Molecular Cell*, 6(2), 409-419.
- 411 Kurlawala, Z., & Beverly, L. (2017). Ubiquilin Proteins are critical adaptors that regulate  
412 proteostasis. *Journal of Cell Signaling*, 2, 145.
- 413 Kurlawala, Z., Dunaway, R., Shah, P. P., Gosney, J. A., Siskind, L. J., Ceresa, B. P., &  
414 Beverly, L. J. (2017). Regulation of insulin-like growth factor receptors by  
415 Ubiquilin1. *Biochem J*, 474(24), 4105-4118. doi:10.1042/BCJ20170620

- 416 Kurlawala, Z., Shah, P. P., Shah, C., & Beverly, L. J. (2017). The STI and UBA Domains  
417 of UBQLN1 are Critical Determinants of Substrate Interaction and Proteostasis. *J*  
418 *Cell Biochem.* doi:10.1002/jcb.25880
- 419 Lee, D. Y., Arnott, D., & Brown, E. J. (2013). Ubiquilin4 is an adaptor protein that recruits  
420 Ubiquilin1 to the autophagy machinery. *EMBO Rep*, 14(4), 373-381.  
421 doi:10.1038/embor.2013.22
- 422 Lim, P. J., Danner, R., Liang, J., Doong, H., Harman, C., Srinivasan, D., . . . Monteiro, M.  
423 J. (2009). Ubiquilin and p97/VCP bind erasin, forming a complex involved in ERAD.  
424 *J Cell Biol*, 187(2), 201-217. doi:10.1083/jcb.200903024
- 425 Lurje, G., & Lenz, H.-J. (2009). EGFR signaling and drug discovery. *Oncology*, 77(6),  
426 400-410.
- 427 Mah, A. L., Perry, G., Smith, M. A., & Monteiro, M. J. (2000). Identification of ubiquilin, a  
428 novel presenilin interactor that increases presenilin protein accumulation. *J Cell*  
429 *Biol*, 151(4), 847-862. Retrieved from  
430 <https://www.ncbi.nlm.nih.gov/pubmed/11076969>
- 431 Marin, I. (2014). The ubiquilin gene family: evolutionary patterns and functional insights.  
432 *BMC Evol Biol*, 14, 63. doi:10.1186/1471-2148-14-63
- 433 Massey, L. K., Mah, A. L., Ford, D. L., Miller, J., Liang, J., Doong, H., & Monteiro, M. J.  
434 (2004). Overexpression of ubiquilin decreases ubiquitination and degradation of  
435 presenilin proteins. *J Alzheimers Dis*, 6(1), 79-92. Retrieved from  
436 <http://www.ncbi.nlm.nih.gov/pubmed/15004330>
- 437 N'Diaye, E. N., Hanyaloglu, A. C., Kajihara, K. K., Puthenveedu, M. A., Wu, P., von  
438 Zastrow, M., & Brown, E. J. (2008). The ubiquitin-like protein PLIC-2 is a negative

439 regulator of G protein-coupled receptor endocytosis. *Mol Biol Cell*, 19(3), 1252-  
440 1260. doi:10.1091/mbc.E07-08-0775

441 N'Diaye, E. N., Kajihara, K. K., Hsieh, I., Morisaki, H., Debnath, J., & Brown, E. J. (2009).  
442 PLIC proteins or ubiquilins regulate autophagy-dependent cell survival during  
443 nutrient starvation. *EMBO reports*, 10(2), 173-179.

444 Oliveira, S., Schiffelers, R., Storm, G., Henegouwen, P., & Roovers, R. (2009). Crosstalk  
445 between epidermal growth factor receptor-and insulin-like growth factor-1 receptor  
446 signaling: implications for cancer therapy. *Current cancer drug targets*, 9(6), 748-  
447 760.

448 Porta, R., Sanchez-Torres, J., Paz-Ares, L., Massuti, B., Reguart, N., Mayo, C., . . .  
449 Salinas, P. (2011). Brain metastases from lung cancer responding to erlotinib: the  
450 importance of EGFR mutation. *European Respiratory Journal*, 37(3), 624-631.

451 Renaud, L., Picher-Martel, V., Codron, P., & Julien, J. P. (2019). Key role of UBQLN2 in  
452 pathogenesis of amyotrophic lateral sclerosis and frontotemporal dementia. *Acta*  
453 *Neuropathol Commun*, 7(1), 103. doi:10.1186/s40478-019-0758-7

454 Saliba, R. S., Pangalos, M., & Moss, S. J. (2008). The ubiquitin-like protein Plic-1  
455 enhances the membrane insertion of GABAA receptors by increasing their stability  
456 within the endoplasmic reticulum. *J Biol Chem*, 283(27), 18538-18544.  
457 doi:10.1074/jbc.M802077200

458 Shafi, O. (2016). Inverse relationship between Alzheimer's disease and cancer, and other  
459 factors contributing to Alzheimer's disease: a systematic review. *BMC neurology*,  
460 16(1), 236.

- 461 Shah, P. P., Lockwood, W. W., Saurabh, K., Kurlawala, Z., Shannon, S. P., Waigel, S., .  
462 . . Beverly, L. J. (2015). Ubiquilin1 represses migration and epithelial-to-  
463 mesenchymal transition of human non-small cell lung cancer cells. *Oncogene*,  
464 34(13), 1709-1717. doi:10.1038/onc.2014.97
- 465 Sun, Q., Liu, T., Yuan, Y., Guo, Z., Xie, G., Du, S., . . . Chen, L. (2015). MiR-200c inhibits  
466 autophagy and enhances radiosensitivity in breast cancer cells by targeting  
467 UBQLN1. *Int J Cancer*, 136(5), 1003-1012. doi:10.1002/ijc.29065
- 468 Tavassoly, O., Sato, T., & Tavassoly, I. (2020). Inhibition of Brain EGFR Activation: A  
469 Novel Target in Neurodegenerative Diseases and Brain Injuries. *Molecular*  
470 *Pharmacology*.
- 471 Viswanathan, J., Haapasalo, A., Bottcher, C., Miettinen, R., Kurkinen, K. M., Lu, A., . . .  
472 Hiltunen, M. (2011). Alzheimer's disease-associated ubiquilin-1 regulates  
473 presenilin-1 accumulation and aggresome formation. *Traffic*, 12(3), 330-348.  
474 doi:10.1111/j.1600-0854.2010.01149.x
- 475 Wang, L., Chiang, H.-C., Wu, W., Liang, B., Xie, Z., Yao, X., . . . Zhong, Y. (2012).  
476 Epidermal growth factor receptor is a preferred target for treating Amyloid- $\beta$ -  
477 induced memory loss. *Proceedings of the National Academy of Sciences*, 109(41),  
478 16743-16748.
- 479 Wang, Y., Lu, J., Zhao, X., Feng, Y., Lv, S., Mu, Y., . . . Li, Y. (2015). Prognostic  
480 significance of Ubiquilin1 expression in invasive breast cancer. *Cancer Biomark*,  
481 15(5), 635-643. doi:10.3233/CBM-150503
- 482 Wu, A. L., Wang, J., Zheleznyak, A., & Brown, E. J. (1999). Ubiquitin-related proteins  
483 regulate interaction of vimentin intermediate filaments with the plasma membrane.

484 *Mol Cell*, 4(4), 619-625. Retrieved from  
485 <http://www.ncbi.nlm.nih.gov/pubmed/10549293>

486 Yadav, S., Singh, N., Shah, P. P., Rowbotham, D. A., Malik, D., Srivastav, A., . . . Beverly,  
487 L. J. (2017). MIR155 Regulation of Ubiquilin1 and Ubiquilin2: Implications in  
488 Cellular Protection and Tumorigenesis. *Neoplasia*, 19(4), 321-332.  
489 doi:10.1016/j.neo.2017.02.001

490 Yeo, C. D., Park, K. H., Park, C. K., Lee, S. H., Kim, S. J., Yoon, H. K., . . . Kim, T.-J.  
491 (2015). Expression of insulin-like growth factor 1 receptor (IGF-1R) predicts poor  
492 responses to epidermal growth factor receptor (EGFR) tyrosine kinase inhibitors  
493 in non-small cell lung cancer patients harboring activating EGFR mutations. *Lung*  
494 *cancer*, 87(3), 311-317.

495 Zwick, E., Bange, J., & Ullrich, A. (2001). Receptor tyrosine kinase signalling as a target  
496 for cancer intervention strategies. *Endocrine-related cancer*, 8(3), 161-173.

497

498

#### 499 Figure Legends

500 **Figure 1:** Ubiquilin1 and Ubiquilin2 interact with EGFR. **(A)** Schematic of Ubiquilin1<sup>WT</sup>,  
501 Ubiquilin1<sup>542X</sup>, Ubiquilin1<sup>112X</sup> and Ubiquilin2<sup>WT</sup> constructs. Ubiquilin1 (590 amino acids)  
502 and Ubiquilin2 (620 amino acids) proteins have an N-terminal UBL domain, four STI  
503 chaperone-like domains in the middle and a C-terminal UBA domain. Ubiquilin2 has  
504 an additional 12-PXX repeat region. **(B)** HEK293T cells were transiently transfected  
505 with FLAG-tagged Ubiquilin1 (U1) and Ubiquilin2 (U2) followed by co-  
506 immunoprecipitation (IP) by anti-FLAG antibody and Western Blot analysis for total

507 EGFR. Both Ubiquilin1 and Ubiquilin2 interact with T-EGFR. **(C)** HEK293T cells were  
508 transiently transfected with FLAG-U1<sup>WT</sup>, FLAG-U1542X, FLAG-U1112X or FLAG-  
509 U2 followed by co-immunoprecipitation by anti-FLAG antibody and probed for EGFR.  
510 All 3 constructs of U1 interact with T-EGFR, indicating that the UBA domain is  
511 dispensable for interaction between these two proteins.

512

513 **Figure 2:** Ubiquilin1 regulates expression and activity of EGFR. **(A)** A549 cells were  
514 transiently transfected with two different siRNA's for Ubiquilin1 (siU1<sup>1</sup> and siU1<sup>2</sup>) along  
515 with non-targeting control (siNT). Cells were serum starved (SS) for 3 hours, incubated  
516 with a protein synthesis inhibitor, Cycloheximide for 1 hour, supplemented with EGF  
517 (50ng/ml) for 3 hours and analyzed by Western Blot. When stimulated with EGF, cells  
518 with loss of Ubiquilin1 demonstrated loss of total EGFR compared to controls. **(B)**  
519 A549 cells were transiently transfected with siRNA for Ubiquilin1, SS for 3 hours and  
520 stimulated with different doses of EGF (10 and 100ng/ml) for 1 hour. Cells lacking  
521 Ubiquilin1 showed a dose-dependent loss of total EGFR, quantified in **(C)** n=3, Two-  
522 way ANOVA, p<0.05. **(D)** A549 cells were transiently transfected with siRNA for  
523 Ubiquilin1, SS for 3 hours and stimulated with EGF (50ng/ml) for indicated time points  
524 (0-240 minutes). As time passed, cells lacking Ubiquilin1 showed significantly  
525 increased loss of total EGFR compared to controls, quantified in **(E)** n=3, Two-way  
526 ANOVA, p<0.05.

527

528 **Figure 3:** UBQLN1 deficient cells show increased cell viability and migration potential.  
529 **(A)** A549 cells were transiently transfected with siRNA for Ubiquilin1 and non-targeting

530 control, and cultured in different conditions as indicated (complete media, serum  
531 starvation (SS) for 3 hours, SS + EGF (50ng/ml), SS+EGF+Erlotinib 1uM). Cells were  
532 harvested after 3 hours and analyzed by Western Blot. When stimulated with EGF,  
533 Ubiquilin1 deficient cells showed almost complete loss of total EGFR and increased  
534 phosphorylated EGFR. **(B)** A549 cells were transiently transfected with siRNA for  
535 Ubiquilin1 and non-targeting control. 12hrs post-transfection, cells reseeded in a 96-  
536 well plate for 12hrs (overnight). Cells were then serum starved for 3 hours followed by  
537 stimulation with EGF in 2% FBS and were cultured for 4 days. Alamar Blue readings  
538 were recorded every 24 hours and relative cell viability of UBQLN1 deficient cells were  
539 compared to control cells on each day. UBQLN1 deficient cells supplemented with  
540 EGF showed significantly increased viability compared to controls. One-way ANOVA,  
541 \*\* $p < 0.01$ , \*\*\*\* $p < 0.0001$  **(C)** A549 cells were transiently transfected with siRNA for  
542 Ubiquilin1, seeded in a transwell setup to assess cell migration in response to EGF  
543 stimulation. Cells were cultured in the top chamber in one of 3 conditions – serum-  
544 free media, serum-free media supplemented with EGF and serum-free media  
545 supplemented with EGF and Erlotinib. Media supplemented with 10% FBS was used  
546 as chemo-attractant in the bottom chamber. At the end of 24 hours, cells were fixed  
547 and probed with HEMA 3 stain and data are quantified in **(D)**. Under all 3 conditions,  
548 UBQLN1 deficient cells demonstrated increased invasive behavior compared to  
549 controls.  $n=2$ , Two-way ANOVA,  $p < 0.05$ .

550

551 **Figure 4:** Loss of UBQLN1 results in increased cell movement and speed. **(A)** A549  
552 cells were transiently transfected with siRNA for Ubiquilin1 and non-targeting control.



553 24hrs post-transfection, cells were reseeded in a plate coated with ECM ( $1\mu\text{g}/\text{cm}^2$ ) for  
554 12hrs (overnight) in complete media. Cells were then serum starved for 3 hours  
555 followed by stimulation with EGF in 2% FBS. Cells were then imaged for 48hrs on a  
556 time-interval of 15mins. All pictures were stitched together to produce a video with  
557 speed of 14fps (Supplementary figure 1). **(B)** 5 single cells were analyzed on Keyence  
558 BZ-X810 to generate Chemotaxis plot. **(C)** Dynamic tracking were also used to  
559 calculate speed and movement of 5 single cells. One-way ANOVA, \* $p<0.05$ ,  
560 \*\*\*\* $p<0.0001$ .  
561

Figure 1

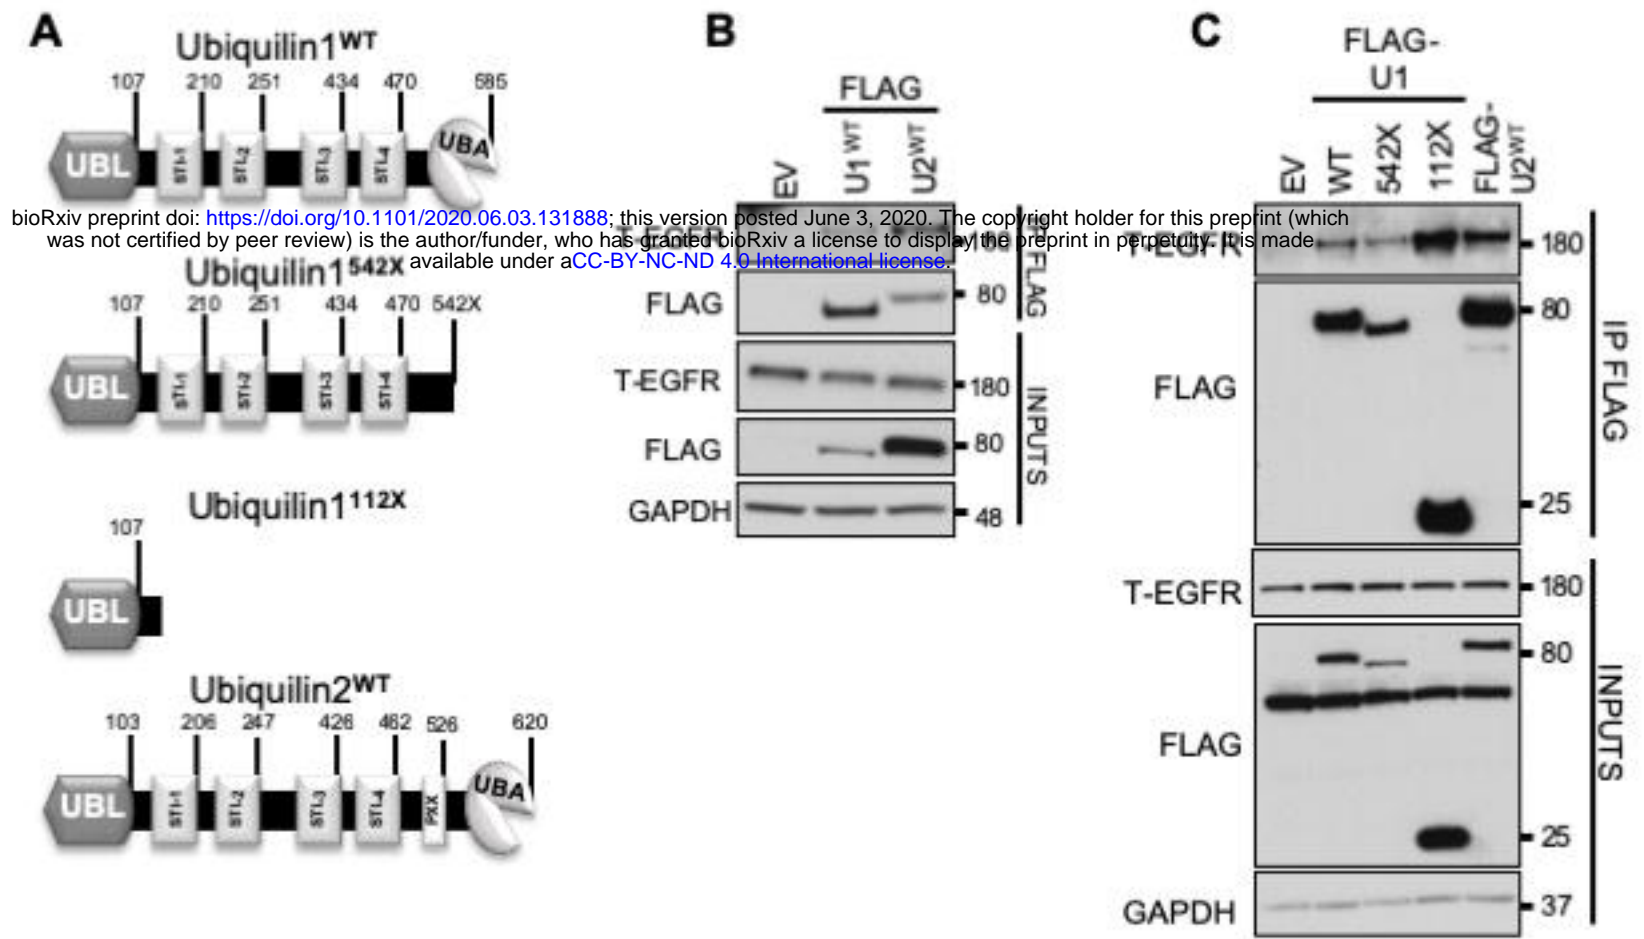

Figure 2

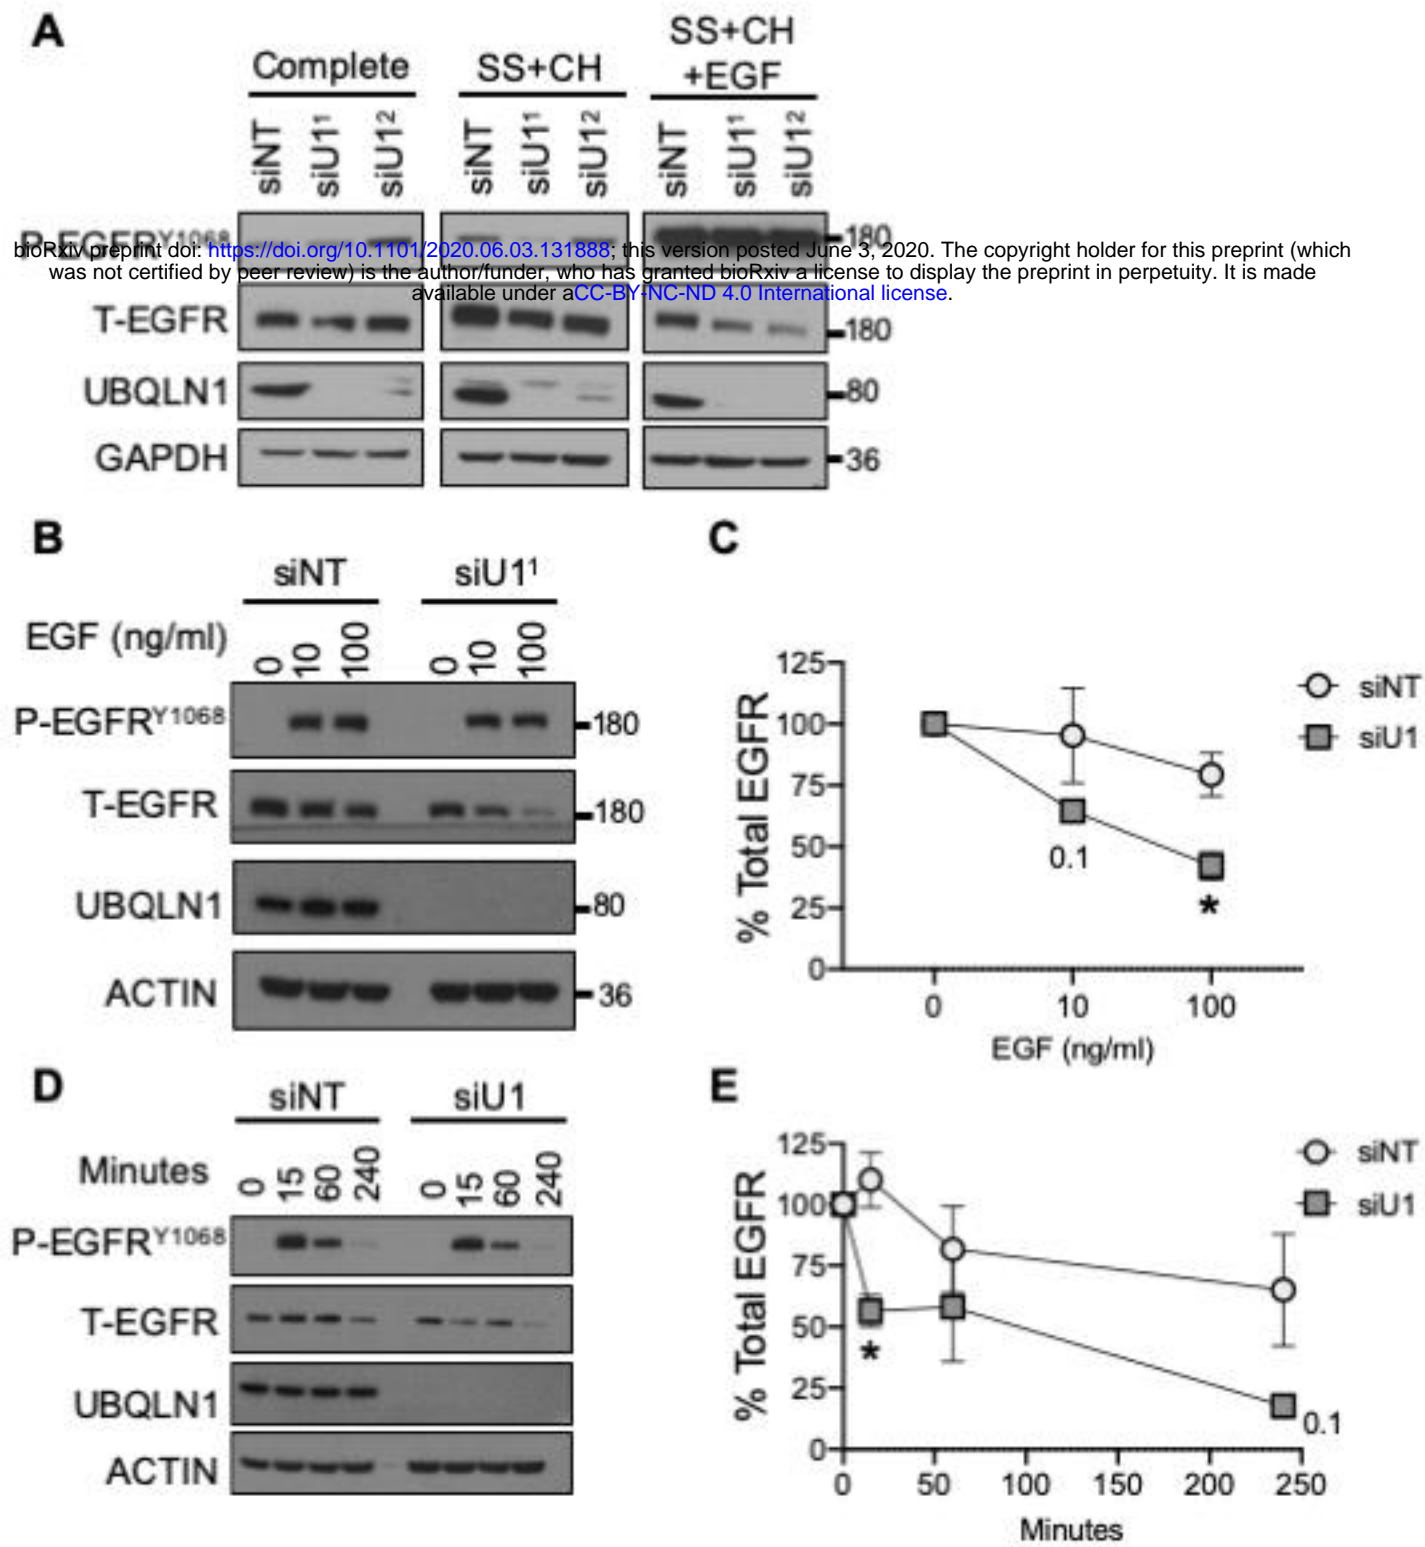

Figure 3

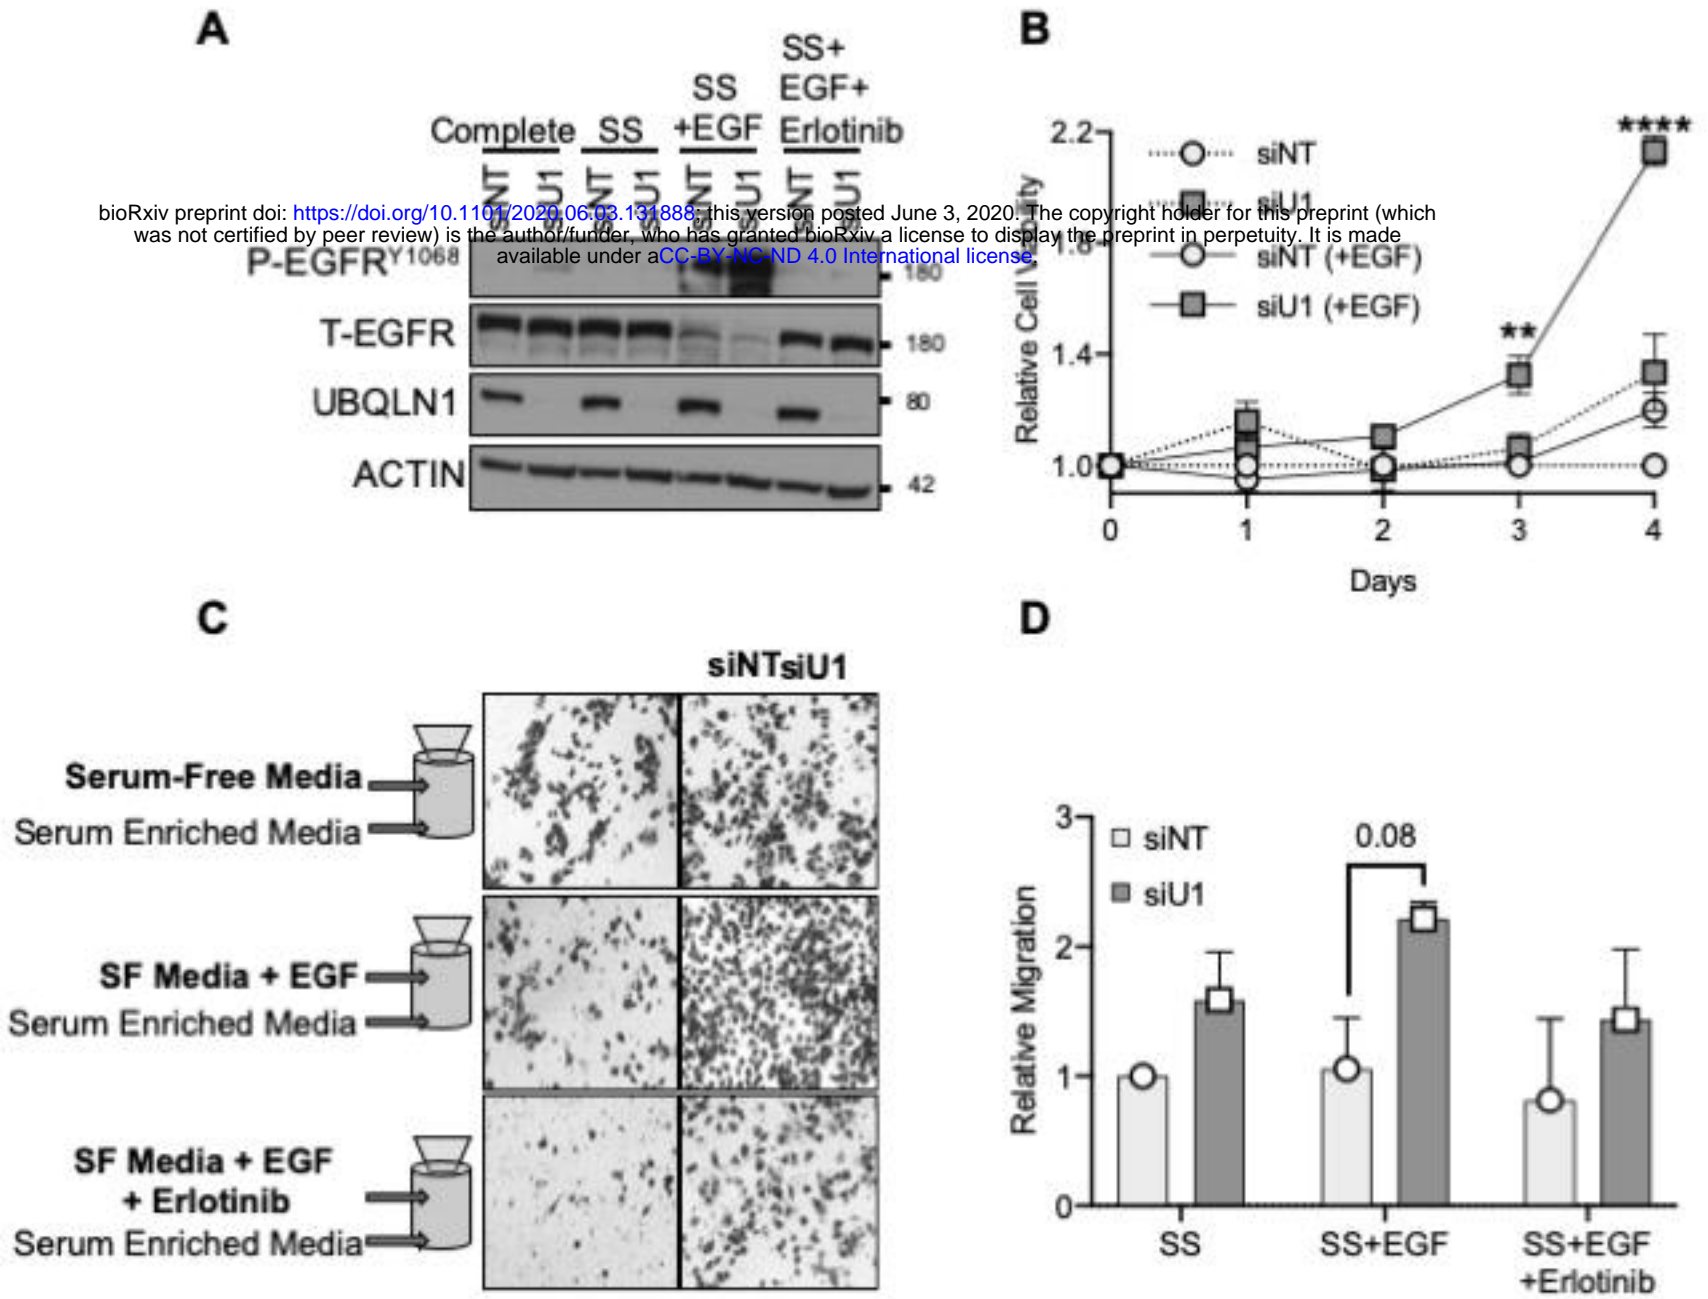

Figure 4

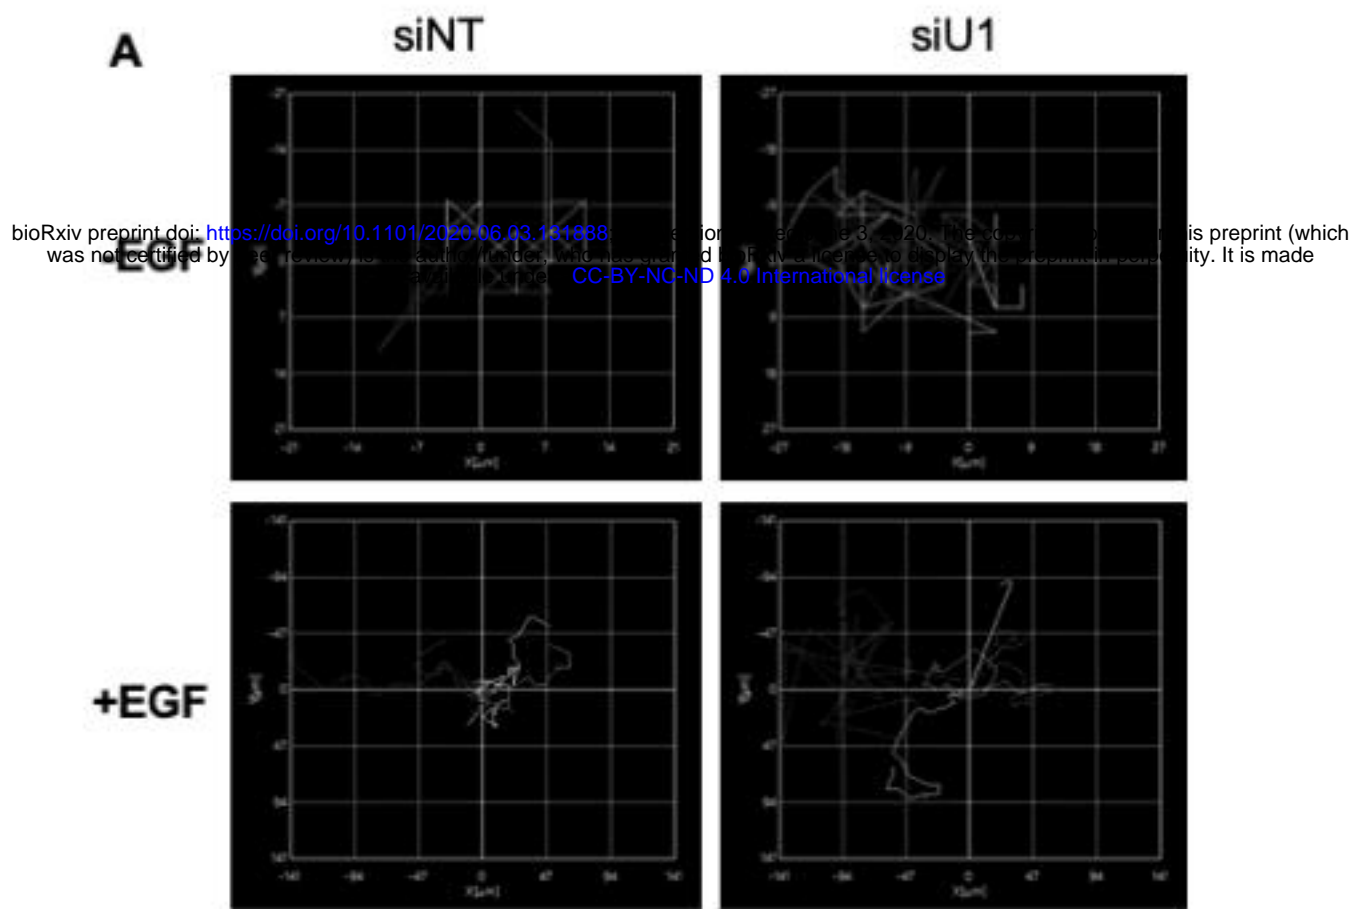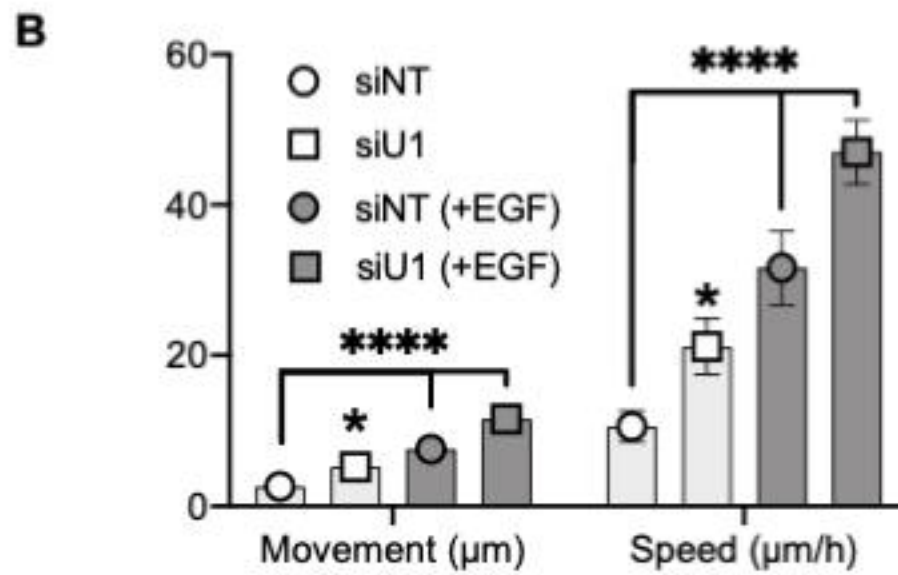

Source: http://biorxiv.org/content/10.1101/2020.06.03.131888v1.full.pdf
